# Supplementary material
Source: HighWire-hosted journal article supplement (https://jitc.bmj.com/content/13/5/e010433)
Supplement: inline-supplementary-material-1 [file inline-supplementary-material-1.pdf]

SUPPLEMENTARY MATERIAL AND METHODS

Phospho-MLKL immunohistochemistry

IHC antibodies:

| Antibody                            | Isotype    | Clone      | Vendor              |
|-------------------------------------|------------|------------|---------------------|
| pMLKL                               | Rabbit IgG | Monoclonal | Abcam               |
| Anti-rat IgG, biotinylated antibody | Rabbit IgG | Polyclonal | Vector laboratories |

Western blot

Western blot antibodies:

| Antibody                             | Isotype    | Clone      | Vendor         |
|--------------------------------------|------------|------------|----------------|
| Anti-rabbit IgG, HRP-linked antibody | Mouse IgG  | Polyclonal | Cell Signaling |
| MLKL                                 | Rabbit IgG | Polyclonal | Cell Signaling |
| RIPK3                                | Rabbit IgG | Polyclonal | ProSci         |
| β-Actin                              | Rabbit IgG | 13E5       | Cell Signaling |

CRISPR-Cas-mediated genome editing

GuideRNA target sequences:

| Gene         | Target sequences                                                       |
|--------------|------------------------------------------------------------------------|
| <i>Mkl1</i>  | gRNA1: 5'-GCACACGGTTTCCTAGACGC-3'<br>gRNA2: 5'-GACTTCATCAAAACGGCCCA-3' |
| <i>Ripk3</i> | gRNA1: 5'-CGGACACGAAGTCCCACTGG-3'<br>gRNA2: 5'-TGGAGAATGGCTCCCTCGCA-3' |

Quantitative real-time PCR

mRNA primer sequences:

| Gene                  | Target sequences                                                                |
|-----------------------|---------------------------------------------------------------------------------|
| <i>Mkl1</i>           | Forward: 5'-CTGAGGGAAGTCTGGATAGAG-3'<br>Reverse: 5'-CGAGGAAACTGGAGCTGCTGAT-3'   |
| <i>Ripk3</i>          | Forward: 5'-GAAGACACGGCACTCCTTGGTA-3'<br>Reverse: 5'-CTTGAGGCAGTAGTTCTTGGTGG-3' |
| <i>Actb</i> (β-actin) | Forward: 5'-CATTGCTGACAGGATGCAGAAGG-3'<br>Reverse: 5'-TGCTGGAAGGTGGACAGTGAGG-3' |

Flow cytometry

Live/Dead Dyes:

| Fluorochrome | Dye name                          | Vendor        | Order #    |
|--------------|-----------------------------------|---------------|------------|
| AmCyan       | Fixable Viability Dye eFluor™ 506 | eBioscience   | 65-0866-18 |
| APC-Cy7      | Fixable Near-IR Dead Cell Stain   | Thermo Fisher | L10119     |
| FITC         | Annexin V                         | Biolegend     | 640906     |
| N/A          | Propidium Iodide                  | Biolegend     | 421301     |

Fluorochrome-coupled antibodies:

| Fluoro-chrome | Target (murine) | Isotype              | Clone   | Vendor      | Order #    |
|---------------|-----------------|----------------------|---------|-------------|------------|
| FITC          | CD3             | Rat IgG2b, κ         | 17A2    | Biolegend   | 100204     |
| PE-Cy7        | CD3             | Rat IgG2b, κ         | 17A2    | Biolegend   | 100219     |
| Pacific Blue  | CD4             | Rat IgG2b, κ         | GK1.5   | Biolegend   | 100428     |
| APC           | CD8             | Rat IgG2b, κ         | 53-6.7  | Biolegend   | 100712     |
| PerCP-Cy5.5   | CD8             | Rat IgG2a, κ         | 53-6.7  | Biolegend   | 100734     |
| APC           | CD11b           | Rat IgG2a, κ         | M1/70   | Biolegend   | 101212     |
| APC-Cy7       | CD11b           | Rat IgG2a, κ         | M1/70   | Biolegend   | 101226     |
| APC           | CD11c           | Armenian hamster IgG | N418    | eBioscience | 17-0114-82 |
| Pacific Blue  | CD11c           | Armenian hamster IgG | N418    | eBioscience | 117322     |
| APC-Cy7       | CD44            | Rat IgG2a, κ         | IM7     | Biolegend   | 103028     |
| APC-Cy7       | CD45.2          | Mouse (SJL) IgG2a, κ | 104     | Biolegend   | 109824     |
| PE-Cy7        | CD45.2          | Mouse (SJL) IgG2a, κ | 104     | Biolegend   | 109829     |
| PerCP-Cy5.5   | CD69            | Armenian Hamster IgG | H1.2F3  | Biolegend   | 104520     |
| PE            | CD80            | Armenian Hamster IgG | 16-10A1 | Biolegend   | 104708     |
| PerCP-Cy5.5   | CD86            | Rat IgG2a, κ         | GL-1    | Biolegend   | 105016     |

|              |                       |                |              |                |            |
|--------------|-----------------------|----------------|--------------|----------------|------------|
| PE-Cy7       | CD86                  | Rat IgG2a, κ   | GL-1         | Biolegend      | 105014     |
| PE           | CD103                 | LOU/M IgG2a, κ | M290         | BD BioSciences | 557495     |
| Pacific Blue | CD107a                | Rat IgG2a, κ   | 1D4B         | eBioscience    | 48-1071-82 |
| PE-Cy7       | F4/80                 | Rat IgG2a, κ   | BM8          | eBioscience    | 25-4801-82 |
| PE-Cy7       | Granzyme B            | Rat IgG2a, κ   | NGZB         | eBioscience    | 25-8898-82 |
| PE           | IFN-γ                 | Rat IgG2a, κ   | XMG1.2       | Biolegend      | 505808     |
| PerCP-Cy5.5  | MHC-I (H2Kd)          | Mouse IgG2a, κ | 34-1-2S      | eBioscience    | 46-5998-82 |
| Pacific Blue | MHC-I (H2Kb)          | Mouse IgG2a, κ | AF6-88.5.5.3 | eBioscience    | 48-5958-82 |
| APC          | MHC-I SIINFEKL (H2Kb) | Mouse IgG1, κ  | 25-D1.16     | Biolegend      | 141606     |
| FITC         | MHC-II (I-A/I-E)      | Rat IgG2a, κ   | M5/114.15.2  | Biolegend      | 107606     |
| PE           | MHC-II (I-A/I-E)      | Rat IgG2a, κ   | M5/114.15.2  | Biolegend      | 107607     |
| APC          | NK1.1                 | Mouse IgG2a, κ | PK136        | Biolegend      | 108710     |

**Short-term ex vivo culture of freshly isolated tumor cells.** Primary cultures were obtained by finely mincing extracted B16.OVA tumors on ice and digestion in 1 mL of phosphate-buffered saline (PBS) supplemented with 0.5% bovine serum albumin (BSA), 0.5 M EDTA, DNase I (100U/mL) and Collagenase II (125 U/mL) for 15 minutes at 37°C in a shaking ThermoMixer at 300 rpm. The digested tumors were filtered through a 100 μm cell strainer, pelleted by centrifugation (400xg, 5 min) and resuspended in 1mL of red blood cell lysis buffer. The lysis was stopped after 1 minute by adding 9 mL of PBS. Cells were spun down again (400xg, 5 min) and then cultured in DMEM supplemented with 15% fetal calf serum (FCS) for 24 hours before cells were lysed for protein extraction.

SUPPLEMENTARY FIGURES WITH LEGENDS

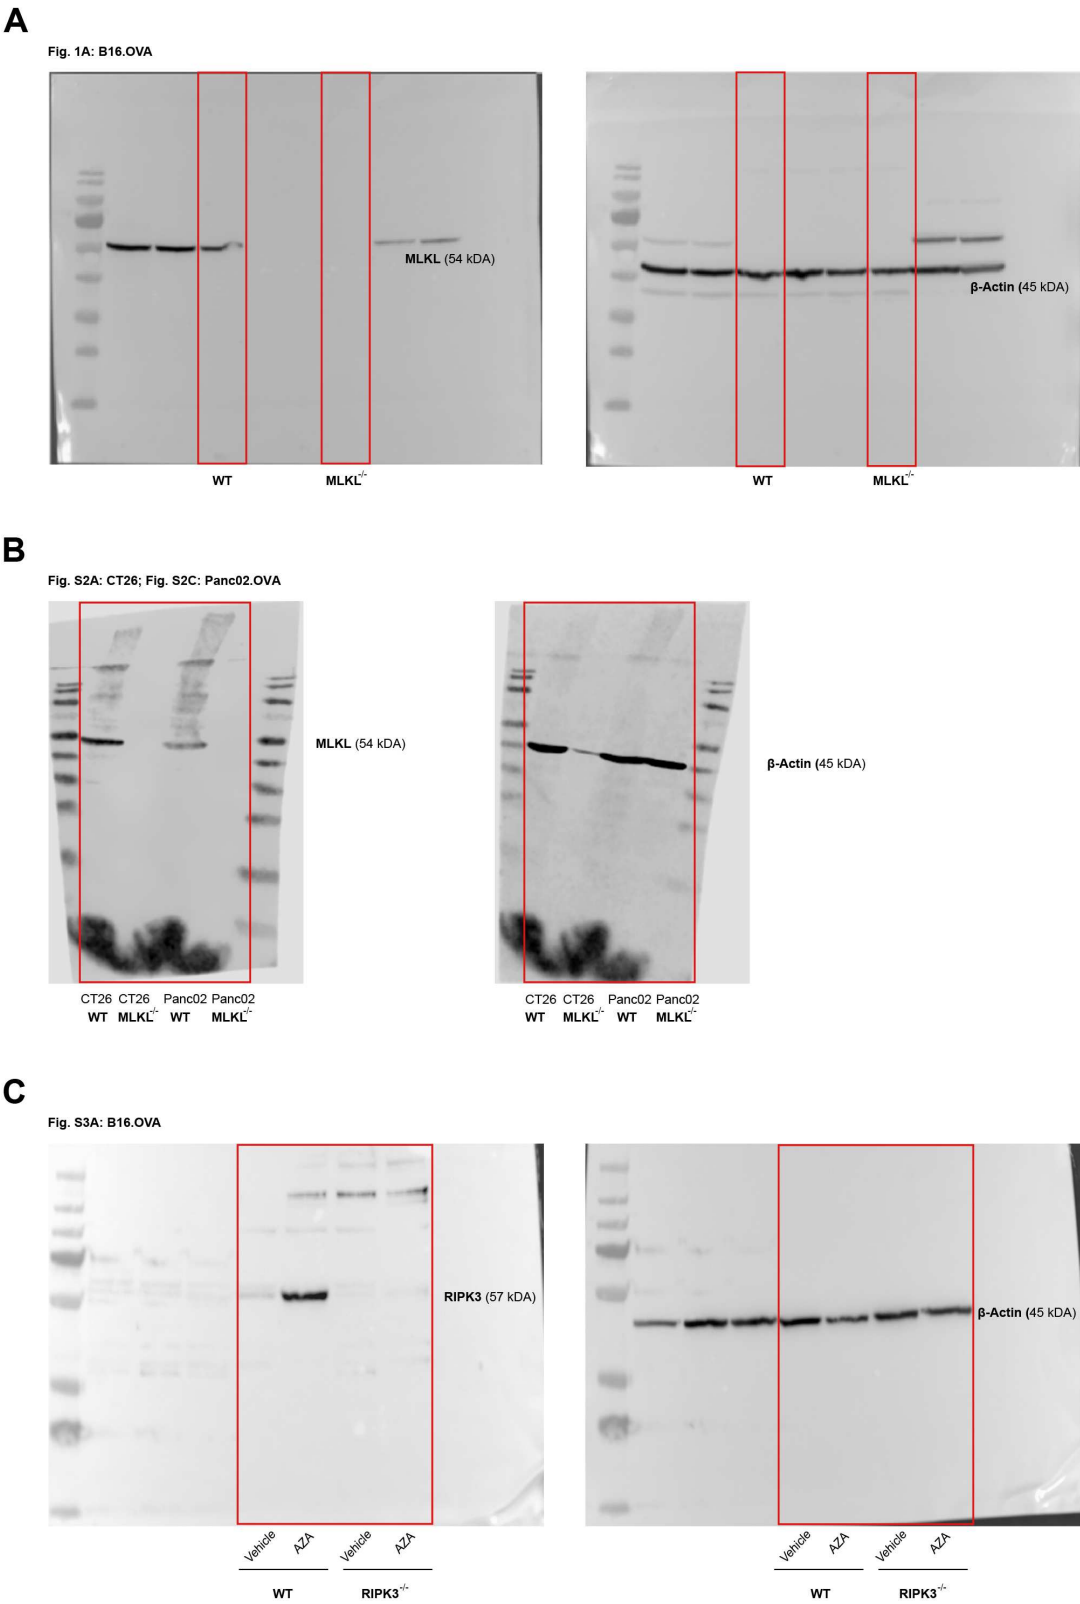

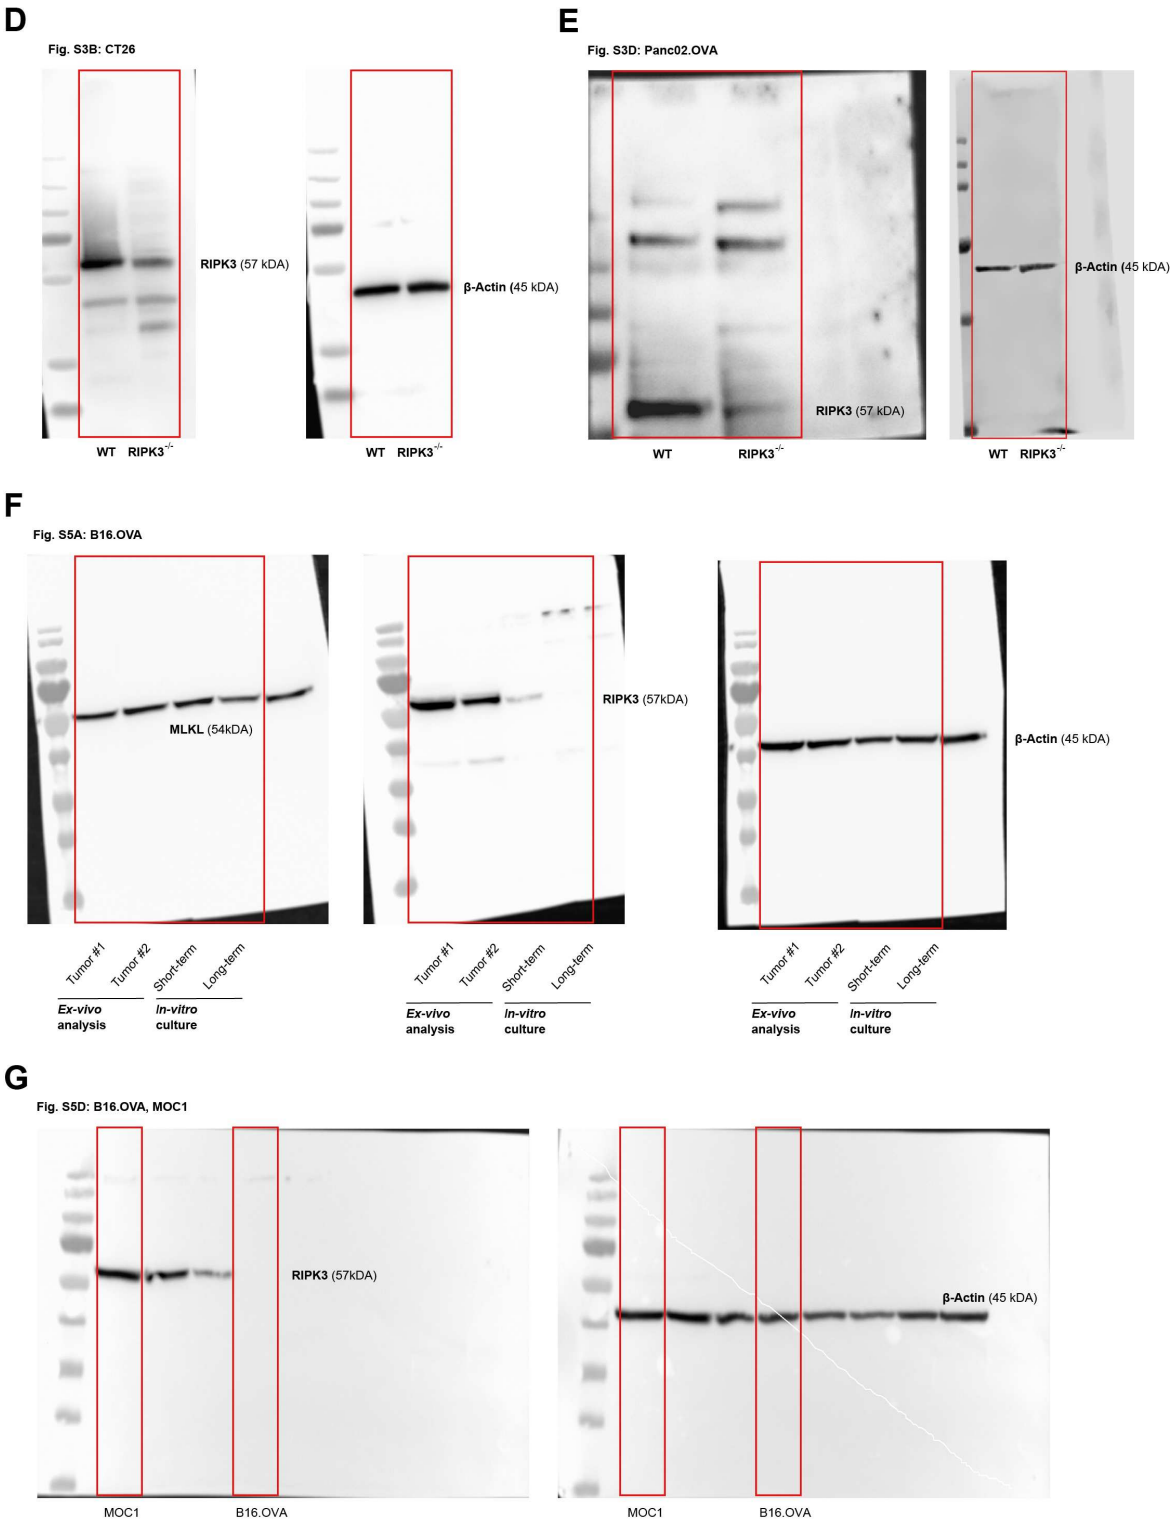

**Figure S1: Raw blots of all presented western blot data. (A)** Full blotting membrane corresponding to Fig 1A: MLKL protein expression in gene engineered B16.OVA cells. **(B)** Full blotting membrane corresponding to Fig S2A and Fig S2C: MLKL protein expression in

Panc02.OVA pancreatic adenocarcinoma cell lines. **(C)** Full blotting membrane corresponding to Fig S3A: RIPK3 protein expression in gene engineered B16.OVA cell lines. **(D)** Full blotting membrane corresponding to Fig S3B: RIPK3 protein expression in gene engineered CT26 colon adenocarcinoma cell lines. **(E)** Full blotting membrane corresponding to Fig S3D: RIPK3 protein expression in gene engineered Panc02.OVA pancreatic adenocarcinoma cell lines. **(F)** Full blotting membrane corresponding to Fig S5A: Expression of MLKL and RIPK3. *Ex vivo* analysis of two freshly isolated samples of B16.OVA tumors from C57BL/J mice (Tumor #1, Tumor #2), or analysis of B16.OVA cells after short term or long-term *in vitro* cell culture. **(G)** Full blotting membrane corresponding to Fig S5D: RIPK3 protein expression in MOC1 and B16.OVA tumor cells under *in vitro* culture conditions.

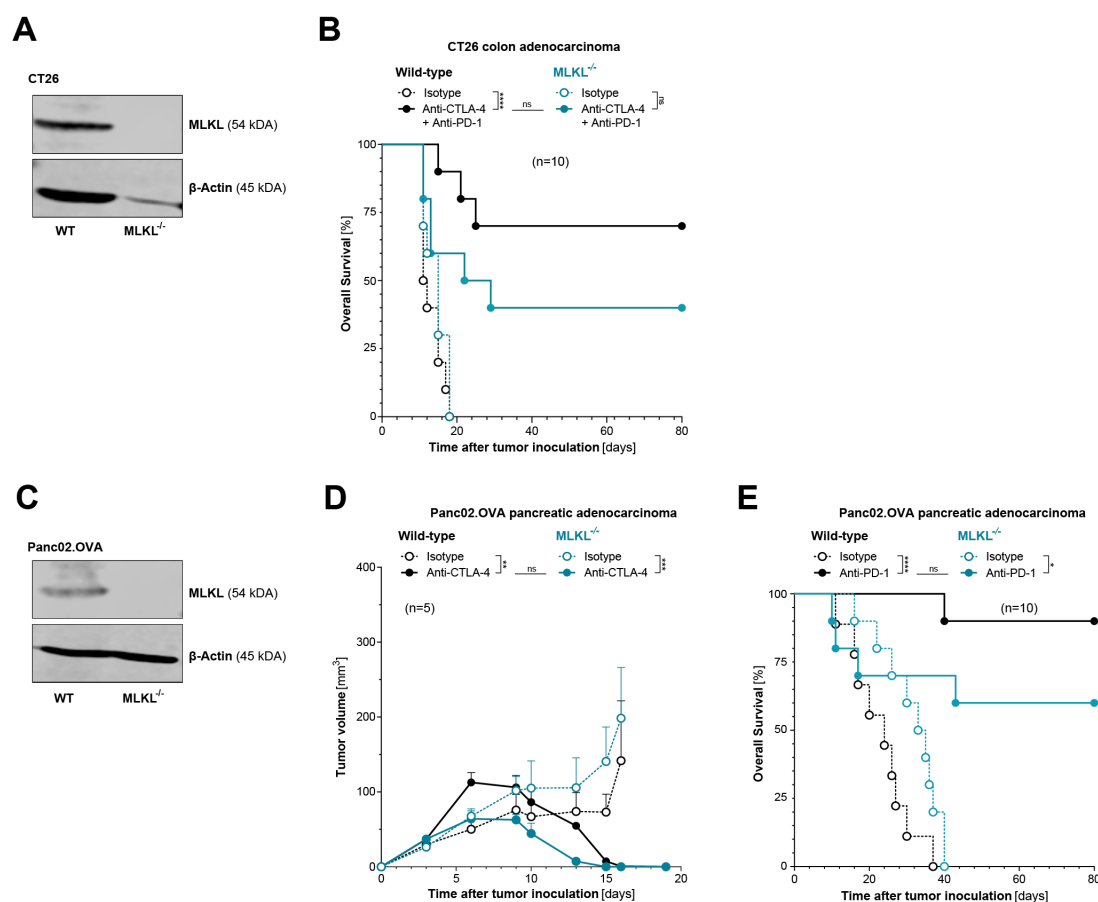

**Figure S2: ICI immunotherapy in CT26 colon but not Panc02.OVA pancreatic adenocarcinoma tumors relies on intrinsic MLKL activity.** (A) MLKL protein expression in CT26 colon adenocarcinoma cell line was assessed using western blotting. (B) Overall survival of n=5 BALB/c mice bearing either wild-type (WT) or MLKL-deficient (MLKL<sup>-/-</sup>) CT26 tumors after treatment with anti-CTLA-4 and anti-PD-1 or isotype control antibodies as described for Figure 1G. (C) MLKL protein expression in Panc02.OVA pancreatic adenocarcinoma cells was assessed using western blotting. (D-E) C57BL6/J mice were inoculated with either WT or MLKL<sup>-/-</sup> Panc02.OVA pancreatic adenocarcinoma cells and were injected intraperitoneally with anti-CTLA-4, anti-PD-1 or isotype control antibodies. (D) Tumor growth of WT and MLKL<sup>-/-</sup> Panc02.OVA tumors in mice treated with anti-CTLA-4. (E) Overall survival of mice bearing either WT or MLKL<sup>-/-</sup> Panc02.OVA tumors after treatment with anti-PD-1. Data show mean tumor volume ± SEM or survival for n=5-10 mice per group that are either pooled from or representative of two independent experiments. Wild-type, WT.

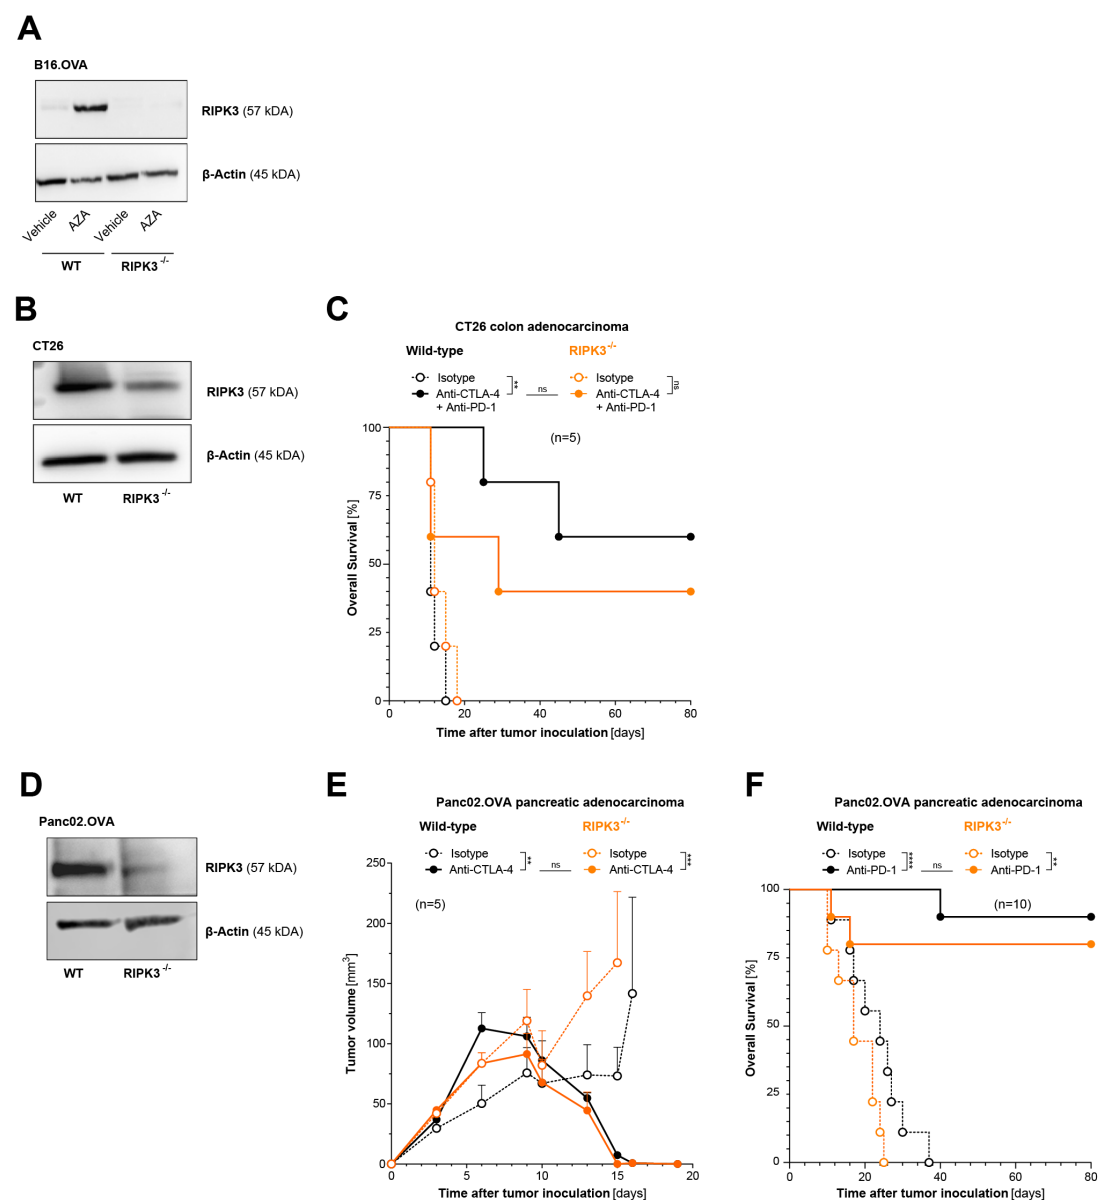

**Figure S3: Tumor cell intrinsic loss of RIPK3 abrogates ICI immunotherapy in CT26 colon but not Panc02.OVA pancreatic adenocarcinoma.** RIPK3 protein expression in gene engineered (A) B16.OVA and (B) CT26 cells was assessed using western blotting. Because of the artificial epigenetic downregulation of RIPK3 in B16.OVA cells under *in vitro* culture conditions, cells were pretreated with 4  $\mu$ M of AZA for 72h to make differences in protein expression between wild-type and gene-engineered cells apparent. A sufficient level of genetic deletion of *Ripk3* in the CT26 cell line was confirmed by sequencing of extracted DNA (data not shown). (C) Overall survival of BALB/c mice bearing either wild-type or RIPK3<sup>-/-</sup> CT26 colon adenocarcinoma tumors after treatment with anti-CTLA-4 and anti-PD-1 as described for Figure 2D. (D) Western blot of RIPK3 protein expression in gene engineered Panc02.OVA



tumor cells. **(E-F)** C57BL6/J mice were inoculated with either WT or MLKL<sup>-/-</sup> Panc02.OVA pancreatic adenocarcinoma cells and were injected intraperitoneally with anti-CTLA-4, anti-PD-1 or isotype control antibodies. **(E)** Tumor growth of WT and RIPK3<sup>-/-</sup> Panc02.OVA tumors after treatment with anti-CTLA-4. **(F)** Overall survival of mice bearing either WT or RIPK3<sup>-/-</sup> Panc02.OVA tumor cells treated with anti-PD-1. Data show mean tumor volume  $\pm$  SEM or survival for n=5-10 individual mice per group that are either pooled from or representative of two independent experiments.

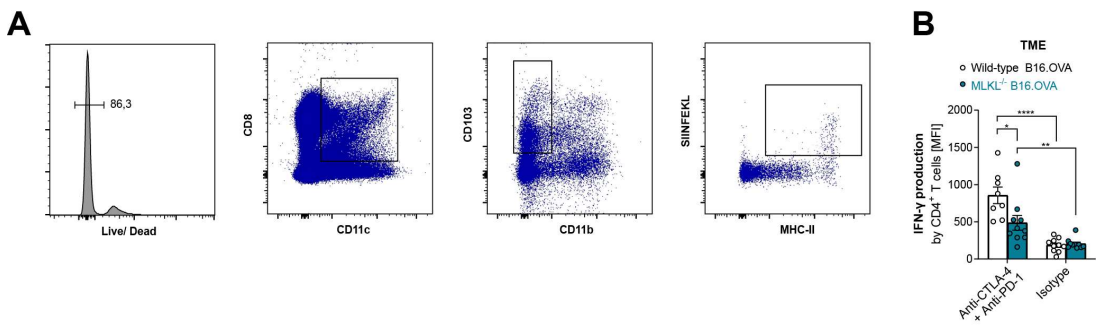

**Figure S4: TME immunophenotyping - Defective necroptosis signaling in tumor cells impedes ICI-induced activation of tumor-infiltrating CD4<sup>+</sup> T cells.** (A) Gating strategy to determine conventional dendritic cells type 1 (cDC1) in the tumor-draining lymph nodes (TdLN). Representative histograms are gated on cell death marker<sup>-</sup> CD8<sup>+</sup> CD11c<sup>+</sup> CD103<sup>+</sup> CD11b<sup>-</sup> MHC-II<sup>high</sup> DCs. Within this population, specific cDC1 were defined as MHC-I SIINFEKL<sup>high</sup> cells. (B) Expression of IFN $\gamma$  in CD4<sup>+</sup> T cells in the TME presented as mean fluorescence intensity (MFI). Conventional dendritic cells type 1, cDC1. Mean fluorescence intensity, MFI. Tumor draining lymph nodes, TdLN.

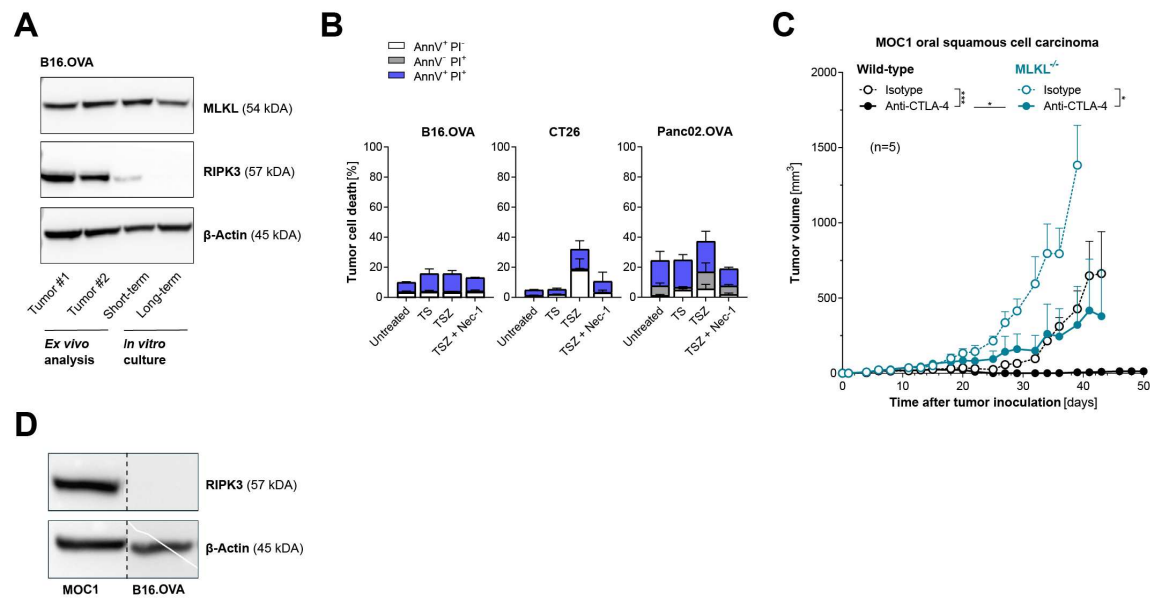

**Figure S5: RIPK3 can be artificially downregulated in some tumor cell lines under *in vitro* culture conditions.** (A) Expression of MLKL and RIPK3 as determined by western blot. *Ex vivo* analysis of two freshly isolated samples of B16.OVA tumors from C57BL/J mice (Tumor #1, Tumor #2), or analysis of B16.OVA cells after short-term or long-term *in vitro* cell culture. (B) Necroptosis was induced in B16.OVA, CT26 and Panc02.OVA cells as described for Figure 4, and cell death was assessed by annexin V and propidium iodide staining. (C) Tumor growth in C57BL6/J mice bearing either WT or MLKL<sup>-/-</sup> MOC1 oral squamous cell carcinoma tumors after treatment with anti-CTLA-4 and anti-PD-1. (D) RIPK3 protein expression in MOC1 and B16.OVA tumor cells under *in vitro* culture conditions was determined by western blot.

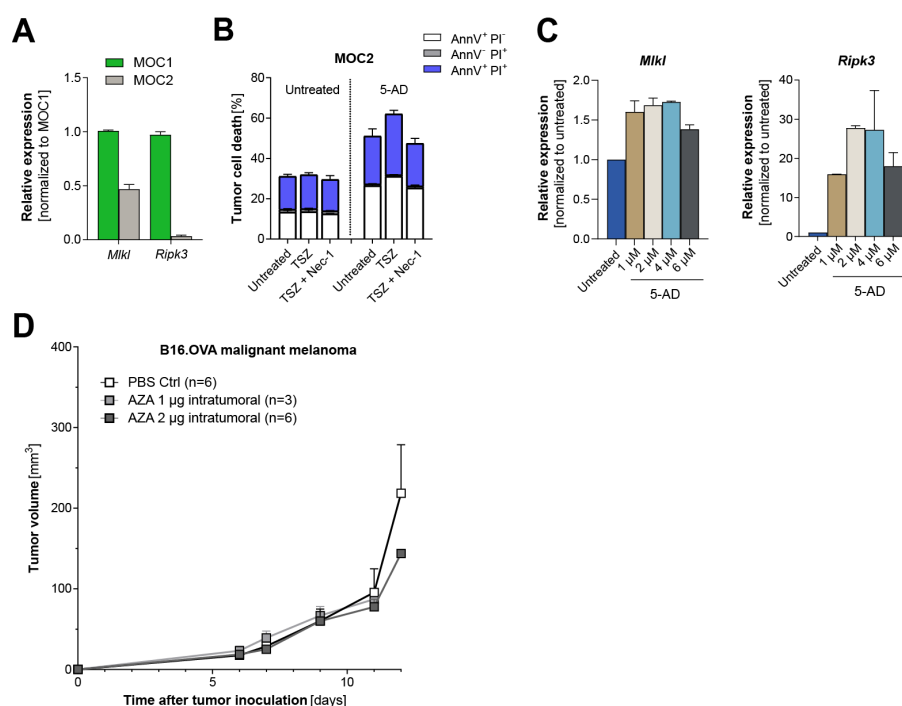

**Figure S6: Exposure to 5-AD upregulated the transcriptional activity of *RIPK3* and *MLKL* and rendered the poorly immunogenic carcinoma cell line MOC2 susceptible to TSZ-induced necroptosis.** (A) Relative gene expression of *Ripk3* and *Mlk1* in MOC1 and MOC2 tumor cell lines. Gene expression was determined by qPCR and normalized to expression in MOC1. (B) MOC2 cells were exposed to 1 µM aza-2'-deoxycytidine (5-AD) for 4 days. Necroptosis was induced in 5-AD-exposed and steady-state MOC2 cells as described for Figure 4. Induction of programmed cell death was assessed by Annexin V / propidium iodide staining and flow cytometry. (C) MOC2 cells were exposed for 4 days to different concentrations of 5-AD and gene expression of *Ripk3* and *Mlk1* was determined by qPCR. All *in vitro* data show mean ± SEM of triplicate samples that are representative of at least two independent experiments. (D) B16.OVA tumor growth in C57BL6/J mice treated with intratumoral injections of different doses of 5-azacytidine (AZA). The tumors were later extracted and used for qPCR analyses shown in Figure 5A. 5-AD, Aza-2'-deoxycytidine; AZA, 5-azacytidine.

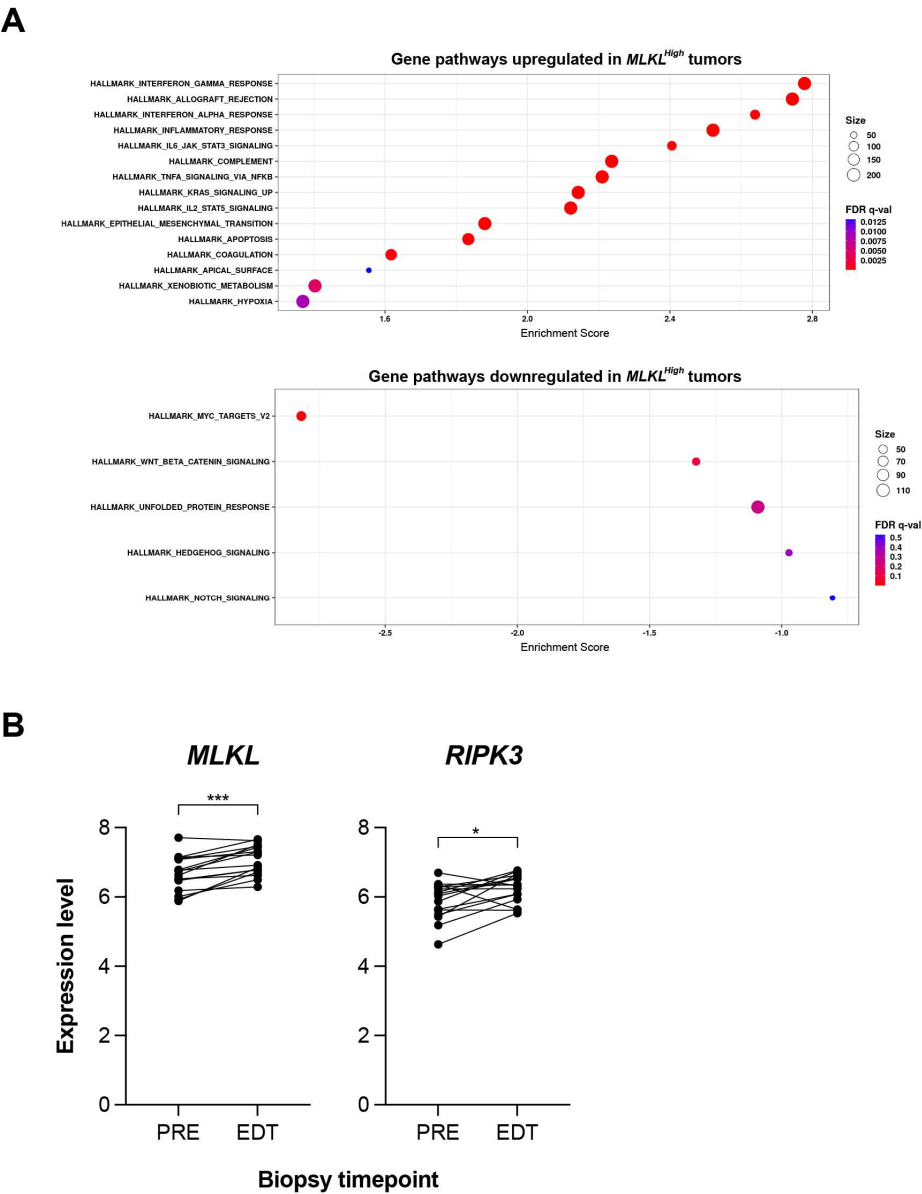

**Figure S7: High transcriptional activity of *MLKL* in human melanoma tumors is associated with increased gene expression of inflammatory pathways. (A)** Gene set enrichment analysis (GSEA) of differentially expressed genes (DEGs) in tumors with high versus low expression of *MLKL* in 472 melanoma patients from the TCGA databank. Fraction of DEGs in pathway is indicated by circle size, significance of enrichment by color. **(B)** Relative expression of indicated genes in paired pre-treatment (PRE) and on-treatment (EDT, early during treatment) tumor biopsies in patients with malignant melanoma undergoing ICI immunotherapy with anti-CTLA and/or anti-PD-1.

| Variable         | N   | HR    | 95% CI        | p-value |
|------------------|-----|-------|---------------|---------|
| Sex              |     |       |               |         |
| male             | 264 | 1.000 | (baseline)    |         |
| female           | 160 | 1.016 | 0.752 - 1.362 | 0.9158  |
| Age, y           |     |       |               |         |
| <55              | 164 | 1.000 | (baseline)    |         |
| 55-65            | 107 | 1.190 | 0.817 - 1.716 | 0.3573  |
| >65              | 153 | 1.671 | 1.182 - 2.364 | 0.0036  |
| Tumor stage UICC |     |       |               |         |
| I                | 93  | 1.000 | (baseline)    |         |
| II               | 140 | 1.193 | 0.792 - 1.804 | 0.3994  |
| III              | 169 | 1.925 | 1.331 - 2.815 | 0.0006  |
| IV               | 22  | 3.504 | 1.643 - 6.791 | 0.0005  |
| MLKL             |     |       |               |         |
| low              | 212 | 1.000 | (baseline)    |         |
| high             | 212 | 0.511 | 0.379 - 0.686 | <0.0001 |

**Table S1: Low *MLKL* expression in melanoma biopsies is an independent risk factor for death.** Multi-variable Cox regression analysis for overall survival in patients with malignant melanoma. HR, hazard ratio; CI, confidence interval; y, year.
